# Supplementary material for: Tunable dipole and carrier mobility for a few layer Janus MoSSe structure
Source: Royal Society of Chemistry journal article supplement (doi:10.1039/c7tc05225a), 2018-01-01
Supplement: c7tc05225a1.pdf [file c7tc05225a1.pdf]

## Title: The Tunable Dipole and Carrier Mobility for Few Layer Janus MoSSe

### Structure

Wen-Jin Yin<sup>1,2</sup>, Bo Wen<sup>2</sup>, Guo-Zheng Nie<sup>1</sup>, Xiao-Lin Wei<sup>3</sup>, and Li-Min Liu<sup>\*2</sup>

<sup>1</sup>School of Physics and Electronic Science, Hunan University of Science and Technology, Xiangtan 411201, China

<sup>2</sup>Beijing Computational Science Research Center, Beijing 100084, China

<sup>3</sup>Department of Physics and Laboratory for Quantum Engineering and Micro-Nano Energy Technology, Xiangtan University, Xiangtan 411105, Hunan, China

\*Email: [limin.liu@csrc.ac.cn](mailto:limin.liu@csrc.ac.cn)

### Supporting Information

**Table. S1.** The carrier mobility of few layer MoSSe predicted by theoretical calculations at 300 K. The  $m_e^*$  ( $m_h^*$ ),  $E_e$  ( $E_h$ ), and  $\mu_e$  ( $\mu_h$ ) indicate the effective mass, deformation potential, carrier mobility for the electron at CBM (hole at VBM),  $C_{2D}$  is the elastic moduli along the x direction. It should be mentioned that we use AC-stacking mode to model the structure as the thickness larger than one layer. The few layer MoS<sub>2</sub> structures are also presented for comparison.

| System           | Thickness (layers) | $m_e^*$ ( $m_0$ ) | $m_h^*$ | $E_e$ (eV)  | $E_h$       | $C_{2D}$ (Jm <sup>-2</sup> ) | $\mu_e$ (cm <sup>2</sup> V <sup>-1</sup> s <sup>-1</sup> ) | $\mu_h$     |
|------------------|--------------------|-------------------|---------|-------------|-------------|------------------------------|------------------------------------------------------------|-------------|
| MoS <sub>2</sub> | 1                  | 0.53              | 0.59    | 7.26        | 1.36        | <b>136.01</b>                | 160.6                                                      | 2047.8      |
|                  | 2                  | 0.65              | 0.61    | 3.71        | 3.84        | <b>363.30</b>                | 1897                                                       | 1111        |
|                  | 3                  | 0.62              | 0.60    | 2.58        | 2.34        | <b>542.2</b>                 | 5999                                                       | 5218        |
| MoSSe            | 1                  | 0.60              | 0.73    | 10.27       | 4.68        | <b>145.6</b>                 | 73.8                                                       | 157.2       |
|                  | 2                  | 0.57              | 0.7     | <b>3.46</b> | 1.73        | <b>239</b>                   | <b>1194</b>                                                | 2915.6      |
|                  | 3                  | 0.57              | 0.9     | 10.30       | <b>1.35</b> | <b>364</b>                   | 205                                                        | <b>5894</b> |
|                  | 4                  | 0.49              | 0.87    | 3.15        | <b>2.71</b> | <b>486.6</b>                 | 2443.2                                                     | 2052        |
